# Supplementary material for: Extracellular vesicles produced by 3D cultured MSCs promote wound healing by regulating macrophage activation through ANXA1
Source: Royal Society of Chemistry journal article supplement (doi:10.1039/d3bm02035e), 2024-01-01
Supplement: d3bm02035e2.pdf [file d3bm02035e2.pdf]

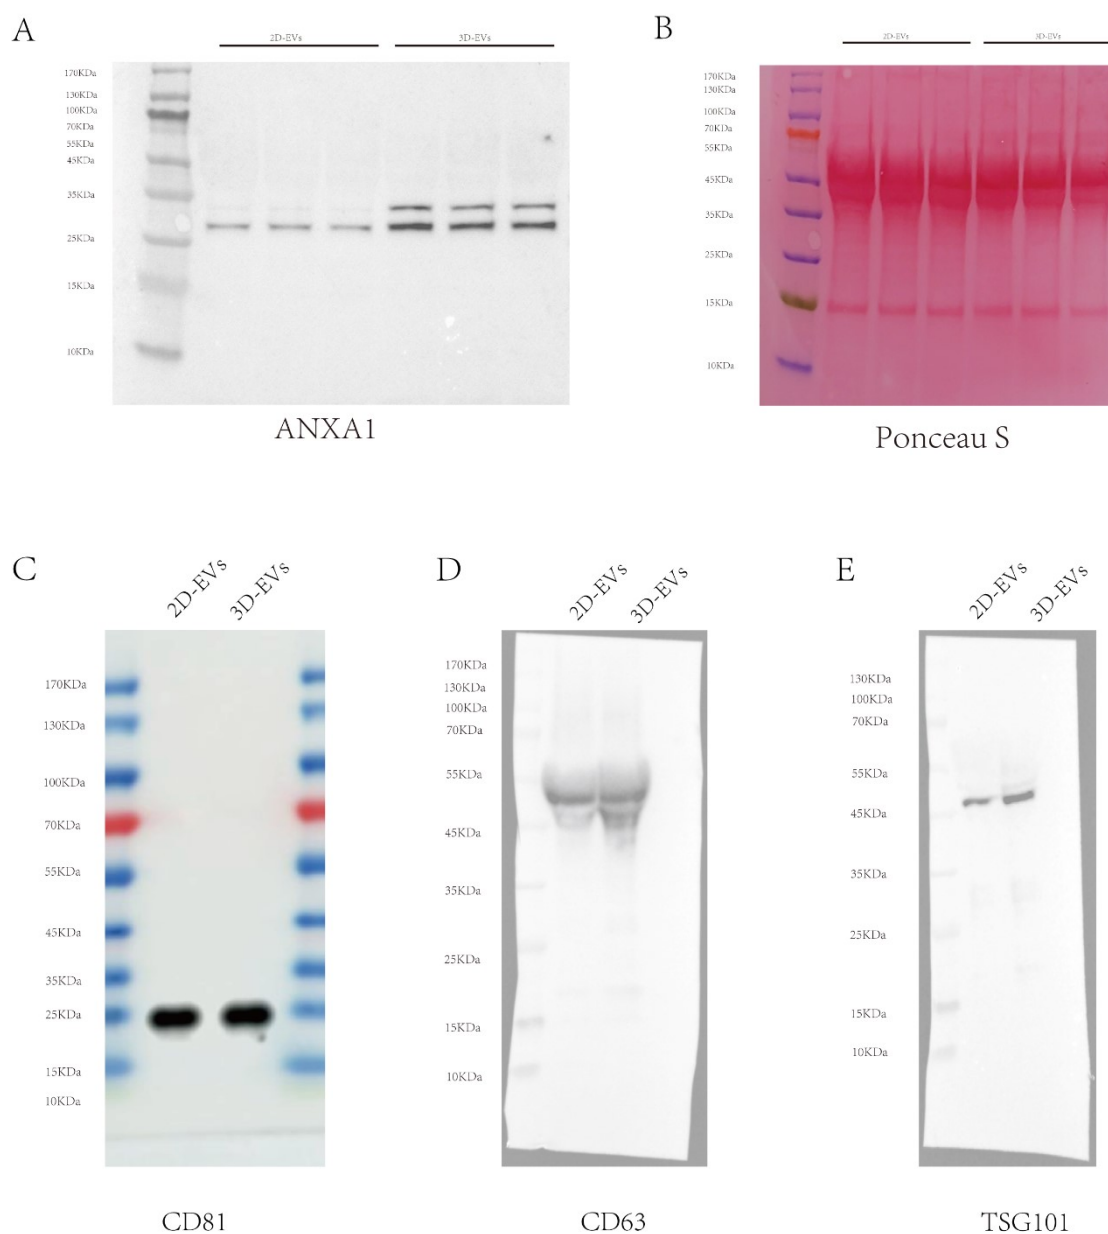

### Supplement data

(A) Western blotting analysis of ANXA1, grouped as 2D-EVs and 3D-EVs. (B) Ponceau S staining of EVs total protein. (C · D · E) Western blotting analysis of hucMSCs-exo markers, including CD81, CD63, and TSG101.
